# Supplementary material for: Evidence on the Human Health Effects of Low-Level Methylmercury Exposure
Source: PubMed Central journal article supplement (PMC3385440; doi:10.1289/ehp.1104494), 2012-01-24
Supplement: ehp.1104494.s001.pdf [file ehp.1104494.s001.pdf]

## **Supplemental Material**

### **Evidence on the Human Health Effects of Low Level Methylmercury Exposure**

Margaret R. Karagas, Anna L. Choi, Emily Oken, Milena Horvat, Rita Schoeny, Elizabeth Kamai,

Whitney Cowell, Philippe Grandjean, Susan Korrick

**Table of Contents:**

Supplemental Material, Table S1. Published Studies of Low-Level Methylmercury Exposure and Birth Outcomes .....pg. S3 – S5

Supplemental Material, Table S2. Published Studies of Low-Level Methylmercury Exposure and Neurocognitive and Behavioral Outcomes .....pg. S6 – S13

Supplemental Material, Table S3. Published Studies of Low-Level Methylmercury Exposure and Cardiovascular Outcomes .....pg. S14 – S16

Supplemental Material, Table S4. Published Studies of Low-Level Methylmercury Exposure and Immunologic Outcomes .....pg. S17 – S18

References .....pg. S19 – S23

**Supplemental Material, Table S1. Published Studies of Low-Level Methylmercury Exposure and Birth Outcomes and Infant Growth (listed by year of publication)**

| Author                | Population/<br>Study Group                                                  | Study Design                                                                   | Sample<br>Size | Exposure<br>Assessment  | Exposure Level                                                                                                                    | Outcomes                                                        | Findings                                                                                                                                                                                           | Other<br>contaminants/<br>nutrients<br>examined |
|-----------------------|-----------------------------------------------------------------------------|--------------------------------------------------------------------------------|----------------|-------------------------|-----------------------------------------------------------------------------------------------------------------------------------|-----------------------------------------------------------------|----------------------------------------------------------------------------------------------------------------------------------------------------------------------------------------------------|-------------------------------------------------|
| Sikorski et al., 1986 | Lublin, Poland                                                              | Birth Cohort, enrolled at labor/delivery                                       | N=41           | Maternal scalp hair Hg  | Mean: 1.88 µg/g<br>Range: 0.02-40.60 µg/g                                                                                         | Birth weight, birth length, head and chest circumference        | Significant inverse correlation between Hg in infant hair and birth weight                                                                                                                         | None                                            |
|                       |                                                                             |                                                                                |                | Maternal pubic hair Hg  | Mean: 1.01 µg/g<br>Range: ND-31.86 µg/g                                                                                           |                                                                 |                                                                                                                                                                                                    |                                                 |
|                       |                                                                             |                                                                                |                | Infant hair Hg          | Mean: 0.11 µg/g<br>Range: ND-0.62 µg/g                                                                                            |                                                                 |                                                                                                                                                                                                    |                                                 |
| Lucas et al., 2004    | Nunavik, Canada                                                             | Birth Cohort, enrolled at labor/ delivery                                      | N=439          | Cord blood Hg           | Geomean: 14.1 µg/L<br>(95% CI 13.,15.2)                                                                                           | Birth weight, gestational age                                   | Mercury levels not significantly associated with birth weight or gestational age in unadjusted models                                                                                              | Cord plasma concentration of n-3 PUFA, PCB      |
| Daniels et al., 2007  | Bristol, England and surrounding areas                                      | Birth Cohort, enrolled during prenatal visits                                  | N=1040         | Cord tissue Hg          | Median: 0.01 µg/g wet weight                                                                                                      | Birth weight, gestational age                                   | Hg in cord tissue not associated with gestational age or birth weight                                                                                                                              | Fish intake                                     |
| Xue et al., 2007      | Five Michigan communities (rural, suburban, urban)                          | Birth Cohort, enrolled at 15 <sup>th</sup> -27 <sup>th</sup> week of pregnancy | N=1024         | Maternal hair Hg        | Mean: 0.29 µg/g<br>Median: 0.23 µg/g<br>Range: 0.01-2.50 µg/g<br>highest Hg levels (≥90 <sup>th</sup> percentile, 0.55-2.50 µg/g) | Gestational age                                                 | Women who delivered at <35 weeks (very pre-term) were more likely to have had hair Hg levels ≥90 <sup>th</sup> percentile (.55-2.5 µg/L).<br>Hg levels not associated with delivery at 35-36 weeks | Fish consumption                                |
| Lederman et al., 2008 | NYC hospitals close to Ground Zero, deliveries between 12/12/01 and 6/26/02 | Birth Cohort, enrolled at labor/ delivery                                      | N=329          | Maternal whole blood Hg | Geomean: 1.6 µg/L;<br>(95% CI 1.4,1.81)                                                                                           | Birth weight, birth length, head circumference, gestational age | No significant relationship between Hg and birth outcomes.                                                                                                                                         | Seafood consumption                             |
|                       |                                                                             |                                                                                |                | Cord blood Hg           | Geomean: 4.44 µg/L;<br>(95% CI 3.91, 5.04)                                                                                        |                                                                 |                                                                                                                                                                                                    |                                                 |

| Supplemental Material, Table S1 (Cont.) Published Studies of Low-Level Methylmercury Exposure and Birth Outcomes and Infant Growth (listed by year of publication) |                                        |                                                                                |                |                                                     |                                             |                                             |                                                                                                                                                                                                                                                                                                                                                     |                                                 |
|--------------------------------------------------------------------------------------------------------------------------------------------------------------------|----------------------------------------|--------------------------------------------------------------------------------|----------------|-----------------------------------------------------|---------------------------------------------|---------------------------------------------|-----------------------------------------------------------------------------------------------------------------------------------------------------------------------------------------------------------------------------------------------------------------------------------------------------------------------------------------------------|-------------------------------------------------|
| Author                                                                                                                                                             | Population/<br>Study Group             | Study Design                                                                   | Sample<br>Size | Exposure<br>Assessment                              | Exposure Level                              | Outcomes                                    | Findings                                                                                                                                                                                                                                                                                                                                            | Other<br>contaminants/<br>nutrients<br>examined |
| Ramon et al., 2009                                                                                                                                                 | Hospital La Fe in Valencia, Spain      | Birth Cohort, enrolled at 10 <sup>th</sup> -13 <sup>th</sup> week of pregnancy | N=554          | Cord blood Hg                                       | Geomean: 9.4 µg/L<br>(95% CI 8.8, 10.2)     | Birth weight, birth length, gestational age | Increased cord blood Hg associated with reduced birth weight and increased risk of being born small for gestational age (SGA) for length.<br>Large oily fish associated with higher risk for SGA for weight.<br>Canned tuna consumption associated with higher birth weight.<br>Lean fish consumption associated with lower risk of SGA for length. | Adjusted by type of fish consumed               |
| Lee et al., 2010                                                                                                                                                   | Seoul, Cheonan, and Ulsan, South Korea | Birth Cohort, enrolled in first trimester of pregnancy                         | N=417          | Cord blood Hg                                       | Geomean: 5.53 µg/L<br>Range 0.23-24.1 µg/L  | Birth weight                                | Lower birth weight with GSTM1 null type and increasing cord blood Hg, and GSTT1 null type and increasing Hg in late pregnancy.<br>No association with GSTM1/GSTT1 present types.<br>>90 <sup>th</sup> percentile late pregnancy Hg levels associated with lower birth weight, especially when GSTM1/ GSTT1 double null                              | Fish intake                                     |
|                                                                                                                                                                    |                                        |                                                                                |                | Early pregnancy (12-20 wks) maternal whole blood Hg | Geomean: 3.67 µg/L<br>Range: 0.27-22.6 µg/L |                                             |                                                                                                                                                                                                                                                                                                                                                     |                                                 |
|                                                                                                                                                                    |                                        |                                                                                |                | Late pregnancy (28-42 wks) maternal whole blood Hg  | Geomean: 3.30 µg/L<br>Range: .12-18.5 µg/L  |                                             |                                                                                                                                                                                                                                                                                                                                                     |                                                 |

**Supplemental Material, Table S1 (Cont.) Published Studies of Low-Level Methylmercury Exposure and Birth Outcomes and Infant Growth (listed by year of publication)**

| Author                        | Population/<br>Study Group             | Study Design                                                     | Sample<br>Size | Exposure<br>Assessment                              | Exposure Level                                       | Outcomes                                                                                                                     | Findings                                                                                                                                                                                                  | Other<br>contaminants/<br>nutrients<br>examined |
|-------------------------------|----------------------------------------|------------------------------------------------------------------|----------------|-----------------------------------------------------|------------------------------------------------------|------------------------------------------------------------------------------------------------------------------------------|-----------------------------------------------------------------------------------------------------------------------------------------------------------------------------------------------------------|-------------------------------------------------|
| Drouillet-Pinard et al., 2010 | France                                 | Birth Cohort, enrolled before 24 <sup>th</sup> week of pregnancy | N=645          | Maternal hair Hg                                    | Median: 0.52 µg/g<br>IQR: 0.30-0.82 µg/g<br>SD.: 2.6 | Ultrasound measures; birth weight, birth length, head circumference, sum of skin folds, gestational length, placental weight | No consistent association between Hg level and fetal growth.                                                                                                                                              | Seafood consumption, Se levels                  |
| Gundacker et al., 2010        | Vienna, Austria                        | Birth Cohort, enrolled during second trimester of pregnancy      | N=53           | Maternal whole blood T-Hg                           | Range: 0.1-5.2 µg/L                                  | Birth weight, birth length, head circumference at birth                                                                      | Maternal hair Hg significantly associated with birth length in bivariate analyses only; otherwise Hg levels not associated with newborn anthropometry                                                     | Pb, seafood consumption                         |
|                               |                                        |                                                                  |                | Placenta T-Hg                                       | Range: 0.1-11.7 µg/g                                 |                                                                                                                              |                                                                                                                                                                                                           |                                                 |
|                               |                                        |                                                                  |                | Placenta I-Hg                                       | Range: 0.1-4.3 µg/g                                  |                                                                                                                              |                                                                                                                                                                                                           |                                                 |
|                               |                                        |                                                                  |                | Placenta Me-Hg                                      | Range: 0.1-9.2 µg/g                                  |                                                                                                                              |                                                                                                                                                                                                           |                                                 |
|                               |                                        |                                                                  |                | Cord blood T-Hg                                     | Range: 0.2-6.8 µg/L                                  |                                                                                                                              |                                                                                                                                                                                                           |                                                 |
|                               |                                        |                                                                  |                | Meconium T-Hg                                       | Range: 0.4-128 µg/g                                  |                                                                                                                              |                                                                                                                                                                                                           |                                                 |
|                               |                                        |                                                                  |                | Breast milk I-Hg                                    | Range: 0.1-2.0 µg/L                                  |                                                                                                                              |                                                                                                                                                                                                           |                                                 |
| Maternal hair T-Hg            | Range: 0.05-0.77 µg/g                  |                                                                  |                |                                                     |                                                      |                                                                                                                              |                                                                                                                                                                                                           |                                                 |
| Kim et al., 2011              | Seoul, Cheonan, and Ulsan, South Korea | Birth Cohort, enrolled in first trimester of pregnancy           | N=797          | Cord blood Hg                                       | Geomean: 5.52 µg/L<br>SD: 1.6 µg/L                   | Infant weight at 6, 12, and 24 months of age                                                                                 | Inverse relationship between infant weight at 24 months and cord blood and late pregnancy maternal blood Hg levels<br>No significant inverse relationship between infant weight at 12 months and Hg level | Fish intake                                     |
|                               |                                        |                                                                  |                | Early pregnancy (12-20 wks) maternal whole blood Hg | Geomean: 3.4 µg/L<br>SD: 1.6 µg/L                    |                                                                                                                              |                                                                                                                                                                                                           |                                                 |
|                               |                                        |                                                                  |                | Late pregnancy (28-42 wks) maternal whole blood Hg  | Geomean: 3.1 µg/L<br>SD: 1.7 µg/L                    |                                                                                                                              |                                                                                                                                                                                                           |                                                 |

Supplemental Material, Table 1 Abbreviations: CI (confidence interval); Geomean (geometric mean); GSTM1 (Glutathione-S-transferases M1); GSTT1 (Glutathione-S-transferases T1); Hg (mercury); I-Hg (inorganic mercury); IQR (interquartile range); Me-Hg (methylmercury); n-3 PUFA (omega-3 polyunsaturated fatty acid); ND (non-detect); PCBs (polychlorinated biphenyls); SD (standard deviation); Se (selenium); T-Hg (total mercury);

**Supplemental Material, Table S2. Published Studies of Low-Level Methylmercury Exposure and Neurocognitive and Behavioral Outcomes (listed by exam age)**

| Author                    | Exam Age | Population/Study Group                                  | Study Design                 | Mercury Exposure Assessment                                                                            | Outcomes (analyses)                                                                                                                                                                          | Findings                                                                                                                                                                       | Comments                                                                                                    |
|---------------------------|----------|---------------------------------------------------------|------------------------------|--------------------------------------------------------------------------------------------------------|----------------------------------------------------------------------------------------------------------------------------------------------------------------------------------------------|--------------------------------------------------------------------------------------------------------------------------------------------------------------------------------|-------------------------------------------------------------------------------------------------------------|
| Suzuki et al., 2010       | 3 days   | 498 mother-newborn (term) pairs in Tohoku, Japan        | Prospective birth cohort     | Median (range):<br>Maternal hair<br>2.0 (0.3-9.4) µg/g                                                 | Neonatal Behavioral Assessment Scale (NBAS); (multivariable linear regression)                                                                                                               | 0.12 point ↓ motor cluster per log increase hair Hg                                                                                                                            | Models adjusted for multiple confounders including PCBs & seafood consumption                               |
| Gao et al., 2007          | 3 days   | 384 mother-newborn (term) pairs in Zhoushan City, China | Prospective birth cohort     | Geomean (IQR):<br>Cord blood 5.6 (4.0-7.8) µg/L<br>Maternal hair<br>1.2 (0.9-1.7) µg/g                 | Neonatal Behavioral Neurological Assessment (NBNA); (logistic regression stratified by sex)                                                                                                  | ↑ prenatal Hg → ↓ NBNA behavior score in males: OR = 1.2, 95% CI 1.1 to 1.4 per log increase cord blood Hg                                                                     | Limited assessment for confounding; multiple (6) outcomes; results attenuated using maternal hair Hg levels |
| Cace et al., 2011         | Neonatal | 137 mother-newborn pairs in Croatia                     | Prospective pregnancy cohort | Mean (range):<br>Maternal hair 0.9 (0.02-8.7) µg/g                                                     | Neurosonographic exam (compare median cerebellar dimensions for high vs. low exposed)                                                                                                        | ↓ 1.6 mm (average) cerebellar length where hair Hg ≥ 1 µg/g (n=30, mean Hg 2.4 µg/g)                                                                                           | Descriptive analysis only; no modeling, no adjustment for confounders, minimal information re. population.  |
| Oken et al., 2005         | 6 mos    | 135 mother-infant pairs in Massachusetts, U.S.A.        | Prospective pregnancy cohort | Mean (range):<br>Maternal hair @ parturition:<br>0.6 (0.02-2.4) µg/g                                   | Visual Recognition Memory (VRM); (multivariable linear regression)                                                                                                                           | ↑ prenatal Hg → ↓ VRM score: -7.5 pts, 95% CI -13.7 to -1.2 per ppm hair Hg                                                                                                    | Models adjusted for multiple confounders including pregnancy fish consumption                               |
| Jedrychowski et al., 2006 | 12 mos   | 233 mother (non-smoking)-infant pairs in Krakow, Poland | Prospective pregnancy cohort | Geomean (range):<br>Maternal blood @ birth:<br>0.6 (0.1-3.4) µg/L<br>Cord blood:<br>0.9 (0.1-5.0) µg/L | Bayley Scales of Infant Development (BSID-II); (multivariable logistic regression; outcome = performance on both Psychomotor Developmental Index (PDI) and Mental Developmental Index (MDI)) | ↑ prenatal Hg → ↑ risk of delay on PDI or MDI (n=36): RR = 3.6, 95% CI 1.4 to 9.1 for cord blood Hg > 0.8 µg/L<br>RR = 2.8, 95% CI 1.2 to 6.8 for maternal blood Hg > 0.5 µg/L | Limited assessment for confounding (e.g., ascertained fish intake but did not include in models)            |

| Supplemental Material, Table S2 (Cont.) Published Studies of Low-Level Methylmercury Exposure and Neurocognitive and Behavioral Outcomes (listed by exam age) |                |                                                         |                              |                                                                                                                                |                                                                                                                         |                                                                                                                                                                                                                                                                                                                                                                                                                                                                                                                                                          |                                                                                                                                                  |
|---------------------------------------------------------------------------------------------------------------------------------------------------------------|----------------|---------------------------------------------------------|------------------------------|--------------------------------------------------------------------------------------------------------------------------------|-------------------------------------------------------------------------------------------------------------------------|----------------------------------------------------------------------------------------------------------------------------------------------------------------------------------------------------------------------------------------------------------------------------------------------------------------------------------------------------------------------------------------------------------------------------------------------------------------------------------------------------------------------------------------------------------|--------------------------------------------------------------------------------------------------------------------------------------------------|
| Author                                                                                                                                                        | Exam Age       | Population/Study Group                                  | Study Design                 | Mercury Exposure Assessment                                                                                                    | Outcomes (analyses)                                                                                                     | Findings                                                                                                                                                                                                                                                                                                                                                                                                                                                                                                                                                 | Comments                                                                                                                                         |
| Jedrychowski et al., 2007                                                                                                                                     | 12, 24, 36 mos | 374 mother (non-smoking)-infant pairs in Krakow, Poland | Prospective pregnancy cohort | (see Jedrychowski et al., 2006)<br>High exposure: Cord blood > 0.9 µg/L (n=177)<br>Low exposure: Cord blood ≤ 0.9 µg/L (n=197) | Bayley Scales of Infant Development (BSID-II); (multivariate linear regression; Generalized Estimating Equations (GEE)) | <p>↑ prenatal Hg → ↓ PDI (cord Hg &gt;0.9 vs. ≤ 0.9 µg/L)<br/>-2.3 pts (p=0.04) at 12 mos<br/>-1.4 pts (p=0.08)<br/>GEE model 12-36 mos</p> <p>↑ prenatal Hg → ↓ MDI (cord Hg &gt; 0.9 vs. ≤ 0.9 µg/L)<br/>-2.8 pts (p=0.01) at 12 mos<br/>-1.4 pts (p=0.11)<br/>GEE model 12-36 mos</p> <p>Null PDI at 24, 36 mos (cord Hg &gt; 0.9 vs. ≤ 0.9 µg/L):<br/>-1.4 pts (p=0.20) at 24 mos<br/>+1.2 pts (p=0.37) at 36 mos</p> <p>Null MDI at 24, 36 mos (cord Hg &gt; 0.9 vs. ≤ 0.9 µg/L):<br/>-1.1pts (p=0.42) at 24 mos<br/>+1.1pts (p=0.37) at 36 mos</p> | Ascertained fish intake but did not include in models. Children lost to follow up at 24 or 36 mos did more poorly on Bayley than those retained. |

| Supplemental Material, Table S2 (Cont.) Published Studies of Low-Level Methylmercury Exposure and Neurocognitive and Behavioral Outcomes (listed by exam age) |                             |                                                                                                                              |                              |                                                                                                                                                |                                                                                                                                                                      |                                                                                                                                                                                                                                                                                                                        |                                                                                                                                                                                                     |
|---------------------------------------------------------------------------------------------------------------------------------------------------------------|-----------------------------|------------------------------------------------------------------------------------------------------------------------------|------------------------------|------------------------------------------------------------------------------------------------------------------------------------------------|----------------------------------------------------------------------------------------------------------------------------------------------------------------------|------------------------------------------------------------------------------------------------------------------------------------------------------------------------------------------------------------------------------------------------------------------------------------------------------------------------|-----------------------------------------------------------------------------------------------------------------------------------------------------------------------------------------------------|
| Author                                                                                                                                                        | Exam Age                    | Population/Study Group                                                                                                       | Study Design                 | Mercury Exposure Assessment                                                                                                                    | Outcomes (analyses)                                                                                                                                                  | Findings                                                                                                                                                                                                                                                                                                               | Comments                                                                                                                                                                                            |
| Daniels et al., 2004                                                                                                                                          | 15, 18 mos                  | 1054 children in Briston, UK (subset from the Avon Longitudinal Study of Parents & Children (ALSPAC))                        | Prospective pregnancy cohort | Median (IQR): Cord tissue 0.01 (0.008-0.02) µg/g wet weight                                                                                    | MacArthur Communicative Development Inventory (MCDI) at 15 mos; Denver Developmental Screening Test (DDST) at 18 mos. (Generalized Linear Models, GLM)               | No association of cord tissue Hg with MCDI or DDST (language & communication skills); maternal & infant fish consumption → ↑MCDI & ↑DDST scores                                                                                                                                                                        | Models adjusted for multiple confounders including fish intake; cord tissue an unusual matrix, (levels ~25% of Faroes cord tissue) with potential greater Hg measurement error than other matrices. |
| Barbone et al., 2004                                                                                                                                          | median 26 mos (range 18-30) | 53 children in northeastern Italy (coastal & inland communities)                                                             | Prospective cohort           | Mean MeHg ~3 mos post-partum (advanced vs. age-appropriate or delayed fine motor): Maternal hair 0.6 vs. 1.0 µg/g Infant hair 0.5 vs. 0.7 µg/g | Denver Developmental Screening Test (DDST-II) once between 18-30 mos.                                                                                                | ↑ postnatal Hg → ↑risk of expected or delayed DDST fine motor-adaptive skill RR = 1.5, 95% CI 1.0 to 2.1 (maternal hair MeHg ≥1 vs. <1 µg/g)                                                                                                                                                                           | Limited assessment for confounding (univariate analyses, fish intake assessed but not modeled). No prenatal exposure measure. Small n & low participation (original cohort n=243)                   |
| Lederman et al., 2008                                                                                                                                         | 12, 24, 36, 48 mos          | 329 mother (non-smoking)-infant pairs; women pregnant during 2001 U.S. World Trade Center attack & living or working in area | Prospective birth cohort     | Geomean (range): Cord blood 4.4 (0.1-63) µg/L Maternal peripartum blood 1.6 (0.07-16) µg/L                                                     | Bayley Scales of Infant Development (BSID-II) at 12, 24, 36 mos; Wechsler Preschool & Primary Scale of Intelligence (WPPSI-R) at 48 mos (multiple linear regression) | At 12, 24 mos (n=130-132): Non-sig PDI, MDI decreases per log cord blood Hg<br>At 36 mos (n=111): ↓4.1 pts PDI per log cord blood Hg (non-sig MDI decreases)<br>At 48 mos (n=107): ↓3.2 pts performance IQ per log cord blood Hg ↓2.9 pts verbal IQ per log cord blood Hg ↓3.6 pts full scale IQ per log cord blood Hg | Models adjusted for multiple confounders including fish intake. Except full scale IQ, Hg associations with other outcomes only significant when models include fish consumption.                    |



| Supplemental Material, Table S2 (Cont.) Published Studies of Low-Level Methylmercury Exposure and Neurocognitive and Behavioral Outcomes (listed by exam age) |            |                                                                              |                                                     |                                                                                                                                       |                                                                                                                                         |                                                                                                                                                                                                                              |                                                                                                                                                                                                                   |
|---------------------------------------------------------------------------------------------------------------------------------------------------------------|------------|------------------------------------------------------------------------------|-----------------------------------------------------|---------------------------------------------------------------------------------------------------------------------------------------|-----------------------------------------------------------------------------------------------------------------------------------------|------------------------------------------------------------------------------------------------------------------------------------------------------------------------------------------------------------------------------|-------------------------------------------------------------------------------------------------------------------------------------------------------------------------------------------------------------------|
| Author                                                                                                                                                        | Exam Age   | Population/Study Group                                                       | Study Design                                        | Mercury Exposure Assessment                                                                                                           | Outcomes (analyses)                                                                                                                     | Findings                                                                                                                                                                                                                     | Comments                                                                                                                                                                                                          |
| Stewart et al., 2003                                                                                                                                          | 38, 54 mos | 212 mother (including Lake Ontario contaminated fish consumers)-infant pairs | Prospective pregnancy cohort                        | Median (IQR):<br>Maternal hair (1 <sup>st</sup> half preg)<br>0.5 (0.4-0.6) µg/g<br>(2 <sup>nd</sup> half preg)<br>0.5 (0.4-0.7) µg/g | McCarthy Scales of Children's Abilities (MSCA);<br>(linear regression)                                                                  | At 38 mos:<br>↓0.3 pts General Cognitive Index (GCI) per unit increase hair Hg where high PCB levels (n=55)<br><br>At 54 mos:<br>No relation of Hg with MSCA                                                                 | Models adjusted for multiple confounders including other neurotoxicants (e.g., PCBs). No main effect of Hg; effect only seen in context of high PCBs but small n.                                                 |
| Oken et al., 2008                                                                                                                                             | 3 yrs      | 341 mother-infant pairs in Massachusetts, U.S.A.                             | Prospective pregnancy cohort                        | Mean (range):<br>Pregnancy (RBC):<br>(0.03-21.9) ng/g                                                                                 | Peabody Picture Vocabulary Test (PPVT) & Wide Range Assessment of Visual Motor Abilities (WRAVMA);<br>(multivariable linear regression) | For upper decile (n=35) vs. <90 <sup>th</sup> percentile RBC Hg:<br><br>PPVT:<br>↓4.5 pts, 95% CI -8.5 to -0.4<br><br>WRAVMA:<br>↓6.0 pts, 95% CI -10.9 to -1.1 matching score;<br>↓4.6 pts, 95% CI -8.3 to -0.9 total score | Models adjusted for multiple confounders including fish intake & n-3 PUFA. RBCs an unconventional matrix (estimate 90 <sup>th</sup> percentile approximates 1 µg/g hair Hg)                                       |
| Freire et al., 2010                                                                                                                                           | 4 yrs      | 72 mother-son pairs in Granada, Spain                                        | Prospective birth cohort (cross-sectional analysis) | Geomean:<br>Child hair at test<br>0.96 µg/g<br>95% CI 0.8-1.2 µg/g                                                                    | McCarthy Scales of Children's Abilities (MSCA);<br>(multivariable linear regression)                                                    | Child hair Hg ≥ 1 µg/L (vs. < 1 µg/L):<br><br>↓6.6 pts, 95% CI -13.0 to -0.2 gen. cognitive score;<br>↓8.4 pts, 95% CI -16.0 to -0.8 memory score;<br>↓ 7.5 pts, 95% CI -15.0 to -0.02 verbal score                          | Models adjusted for multiple confounders including fish intake. Effect of fish intake varied by type (total fish intake mostly adverse). All male cohort. Study population small subset of overall cohort (n~700) |

| Supplemental Material, Table S2 (Cont.) Published Studies of Low-Level Methylmercury Exposure and Neurocognitive and Behavioral Outcomes (listed by exam age) |          |                                                                                           |                          |                                                                                                |                                                                                                                                                                         |                                                                                                                                                                  |                                                                                                                                                       |
|---------------------------------------------------------------------------------------------------------------------------------------------------------------|----------|-------------------------------------------------------------------------------------------|--------------------------|------------------------------------------------------------------------------------------------|-------------------------------------------------------------------------------------------------------------------------------------------------------------------------|------------------------------------------------------------------------------------------------------------------------------------------------------------------|-------------------------------------------------------------------------------------------------------------------------------------------------------|
| Author                                                                                                                                                        | Exam Age | Population/Study Group                                                                    | Study Design             | Mercury Exposure Assessment                                                                    | Outcomes (analyses)                                                                                                                                                     | Findings                                                                                                                                                         | Comments                                                                                                                                              |
| Despres et al., 2005                                                                                                                                          | 4-6 yrs  | 110 Inuit children in Nunavik, Canada (follow up of Cord Blood Monitoring Program, n=483) | Prospective birth cohort | Geomean (range):<br>Cord blood 15.9 (1.8-104) µg/L<br>Child blood at test: 5.9 (0.2-38.2) µg/L | Multiple neuromotor measures (gross & fine motor, reaction time); (hierarchical multivariate linear regression)                                                         | ↑blood Hg at test → ↑action tremor amplitude (no relationship with prenatal Hg)                                                                                  | Models assessed multiple confounders including other neurotoxicants (PCBs, Pb, organochlorine pesticides) & nutrients (Se, n-3 PUFAs)                 |
| Plusquellec et al., 2010                                                                                                                                      | 4-6 yrs  | 110 Inuit children in Nunavik, Canada (follow up of Cord Blood Monitoring Program, n=483) | Prospective birth cohort | Mean (range):<br>Cord blood 22.2 (1.8-104) µg/L<br>Child blood at test 9.6 (0.2-38.2) µg/L     | Infant Behavioral Rating Scale (from Bayley Scales of Infant Development); Coded behavior from video recordings of fine motor testing; (multivariate linear regression) | No Hg-child behavior associations                                                                                                                                | Models assessed multiple confounders including other neurotoxicants (PCBs, Pb, organochlorine pesticides) & nutrients (Se, n-3 PUFAs)                 |
| Saint-Amour et al., 2006                                                                                                                                      | 5-6 yrs  | 102 Inuit children in Nunavik, Canada (follow up of Cord Blood Monitoring Program, n=483) | Prospective birth cohort | Geomean (range):<br>Cord blood 16.5 (1.8-104) µg/L<br>Child blood at test: 5.9 (0.2-38.2) µg/L | Visual Evoked Potentials (VEPs); (multivariable linear regression)                                                                                                      | ↓3-4 ms latency <sup>1</sup> per log ↑child blood Hg<br><br>↑3 ms latency <sup>1</sup> per log ↑cord blood Hg<br>*(time from visual stimulus onset to wave peak) | Models assessed multiple confounders including PCBs, Se & n-3 PUFAs& their interaction with exposure. Small #observations (n=69-72) in final analyses |

**Supplemental Material, Table S2 (Cont.) Published Studies of Low-Level Methylmercury Exposure and Neurocognitive and Behavioral Outcomes (listed by exam age)**

| Author              | Exam Age                                                     | Population/Study Group                                                                                                | Study Design                                                                   | Mercury Exposure Assessment                                                                                             | Outcomes (analyses)                                                                                                                                 | Findings                                                                                                                                                                                                                                                           | Comments                                                                                                                                                                                             |
|---------------------|--------------------------------------------------------------|-----------------------------------------------------------------------------------------------------------------------|--------------------------------------------------------------------------------|-------------------------------------------------------------------------------------------------------------------------|-----------------------------------------------------------------------------------------------------------------------------------------------------|--------------------------------------------------------------------------------------------------------------------------------------------------------------------------------------------------------------------------------------------------------------------|------------------------------------------------------------------------------------------------------------------------------------------------------------------------------------------------------|
| Cao et al., 2010    | 2, 5, 7 yrs                                                  | 780 children from urban Ohio, Pennsylvania, Maryland, New Jersey, U.S.A.                                              | Randomized clinical trial of succimer Rx for moderate childhood lead poisoning | Median (IQR):<br>Child blood at 2 yr baseline<br>0.6 (0.4-0.8) µg/L<br>Child blood post treatment<br>0.5 (0.4-0.8) µg/L | Bayley Scales of Infant Development (BSID-II) at age 2 yrs; Multiple cognitive & behavioral assessments at ages 5 & 7; (general linear models, GLM) | Per log child blood MeHg at 2 yr baseline:<br>↑0.3 pts, 95% CI -1.3 to 1.9<br>Mental Dev Index (sig where high BPb)<br>↑0.8 pts, 95% CI -0.7 to 2.3 IQ at 5 yrs<br>↑0.5 pts, 95% CI -1.0 to 2.1 IQ at 7 yrs<br><br>Behavior (also non-sig, improved pt estimates). | Models adjusted for multiple confounders including BPb & treatment group. No information about fish consumption.                                                                                     |
| Cheuk & Wong, 2006  | Mean (SD) cases<br>7.1 (2.5)<br>controls<br>7.8 (3.5)<br>yrs | 52 ADHD cases (from referral clinic)<br>59 controls (hospitalized for acute upper resp infection) in Hong Kong, China | Case-control study                                                             | Geomean (95% CI):<br>Case blood 3.6 (3.1-4.3) µg/L<br>Ctrl blood 2.3 (2.0-2.7) µg/L                                     | Clinical diagnosis of ADHD (multivariate logistic regression)                                                                                       | Child blood Hg > 5.8 µg/L vs. ≤ 5.8 µg/L:<br>OR = 9.7, 95% CI 2.6 to 36.5 for ADHD diagnosis                                                                                                                                                                       | No information about fish consumption but assumed relatively high. Ctrlrs were not healthy; cases & ctrlrs differed on parental occupation (in models), family history. No ADHD-smoking association. |
| Ha et al., 2009     | 6-10 yrs                                                     | 1778 children from 10 schools in South Korea                                                                          | Cross-sectional survey (part of prospective cohort)                            | Geomean (SD):<br>child blood 2.4 (1.96) µg/L                                                                            | Conners' Parent Rating Scale (ADHD symptoms); (multivariable logistic regression)                                                                   | Child blood Hg quintile 5 (Hg ≥ 4.5) vs. quintile 1 (Hg < 1.5) µg/L :<br>OR = 0.64, 95% CI 0.28 to 1.48                                                                                                                                                            | Models adjusted for multiple confounders including BPb but no information about fish intake.                                                                                                         |
| Surkan et al., 2009 | 6-10 yrs                                                     | 355 children from the New England Children's Amalgam Trial (Massachusetts & Maine)                                    | Randomized Clinical Trial (baseline data used for this analysis)               | Mean (SD):<br>Child hair at baseline:<br>0.3 (0.3) µg/g                                                                 | Multiple psychometric (n=18) measures including IQ, achievement, visual motor & fine motor ability, memory, & executive function.                   | No significant linear rel'p btw Hg & tests.<br><br>Hg < 0.5 → ↑math reasoning; ↑visual-motor skill<br>0.5 ≤ Hg ≤ 1.0 → ↓math reasoning; ↓visual-motor skill<br>Hg > 1.0 (scant data)                                                                               | Models adjusted for multiple confounders including fish consumption & BPb. Assessed non-linear dose-response.                                                                                        |

**Supplemental Material, Table S2 (Cont.) Published Studies of Low-Level Methylmercury Exposure and Neurocognitive and Behavioral Outcomes (listed by exam age)**

| Author                 | Exam Age                                           | Population/Study Group                                                                              | Study Design             | Mercury Exposure Assessment                                                                                          | Outcomes (analyses)                                                                                          | Findings                                                                                                                                        | Comments                                                                                                                                                                                                                                     |
|------------------------|----------------------------------------------------|-----------------------------------------------------------------------------------------------------|--------------------------|----------------------------------------------------------------------------------------------------------------------|--------------------------------------------------------------------------------------------------------------|-------------------------------------------------------------------------------------------------------------------------------------------------|----------------------------------------------------------------------------------------------------------------------------------------------------------------------------------------------------------------------------------------------|
| Boucher et al., 2010   | 10-13 yrs                                          | 118 Inuit children in Nunavik, Canada (follow up of Cord Blood Monitoring Program, n=483)           | Prospective birth cohort | Median (range):<br>Cord blood<br>14.2 (1.8-99.3) µg/L<br>Child blood at test<br>2.8 (0.2-28.1) µg/L                  | Auditory Event-Related Potentials (ERPs) during oddball task; (hierarchical multivariable linear regression) | ↑cord Hg → ↑rxn time & ↓false alarms<br>↑cord Hg → ↑latency & ↑amplitude (more neg) (target condition)<br><br>No sig rel'p btw child Hg & tests | Models assessed multiple confounders include Pb, DHA, and Se. Hg effects enhances among those breastfed < 3 mos.                                                                                                                             |
| Torrente et al., 2005  | 12-14 yrs                                          | 100 children in Terragona, Spain                                                                    | Cross sectional          | Mean (range):<br>Child hair<br>0.7 (0.1-2.2) µg/g                                                                    | Standardized testing; (correlation analyses adjusted for age and SES)                                        | Positive correlation (r=0.20, p<0.05) btw child Hg & visuospatial skills                                                                        | Limited adjustment for potential confounders. Multi-element hair analyses (Cd, Cr, Pb, Mn, Ni, Sn, Hg) assessed one-at-a-time.                                                                                                               |
| Yokoo et al., 2003     | 17-81 yrs (mean 35)                                | 129 Adults in the Pantanal Region, Brazil                                                           | Cross sectional          | Median (range);<br>Adult hair<br>3.7 (0.6-13.6) µg/g                                                                 | Multiple psychometric tests; (multivariable linear & logistic regression)                                    | ↑hair Hg → ↓fine motor speed/dexterity, memory, response inhibition                                                                             | Limited adjustment for confounders (e.g., fish intake not assessed).                                                                                                                                                                         |
| Philibert et al., 2008 | 18-74 yrs<br>Median: 50 yrs (men) & 47 yrs (women) | 243 lake fish eaters in Quebec, Canada                                                              | Cross sectional          | Median (SD):<br>Adult hair<br>0.6 (1.4) men; 0.4 (1.0) women µg/g<br>Adult blood 2.3 (5.5) men; 2.1 (3.9) women µg/L | Brief Symptom Inventory (BSI, neuropsychiatric sx); (multivariate linear regression stratified by sex)       | ↑Hair Hg → ↑BSI for multiple sx (e.g., obsessive-compulsive, depression, anxiety) (women only)                                                  | Positive results in women only. Essentially no associations with blood Hg. Fish, n-3 PUFAs assessed separately.                                                                                                                              |
| Weil et al., 2005      | 50-70 yrs                                          | Random subset (n=474) from Baltimore Memory Study (n=1140) prospective cohort Baltimore, MD, U.S.A. | Cross-sectional          | Median (range):<br>Adult blood<br>2.1 (0-16) µg/L                                                                    | 12 standardized neurobehavioral tests (20 outcome measures); (multivariable linear regression)               | Per IQR ↑Hg:<br>↓3% visual memory (Rey Complex Figure delayed recall);<br><br>↑2% manual dexterity (Finger Tapping)                             | Models considered multiple confounders including fish intake, n-3 PUFAs, BPb, & risk factors for degenerative neurologic disease (e.g., APOE genotype, stroke, diabetes, BMI, homocysteine level, lipids, anihypertension medication, etc.). |

| Supplemental Material, Table S2 (Cont.) Published Studies of Low-Level Methylmercury Exposure and Neurocognitive and Behavioral Outcomes (listed by exam age)                                                                                                                                                                                                                                                                                                                                                                                                                                                                                                                                                                                                                                                                                                                                                                        |                   |                                                            |                 |                                             |                                                                                                    |                                         |                                                                                                                        |
|--------------------------------------------------------------------------------------------------------------------------------------------------------------------------------------------------------------------------------------------------------------------------------------------------------------------------------------------------------------------------------------------------------------------------------------------------------------------------------------------------------------------------------------------------------------------------------------------------------------------------------------------------------------------------------------------------------------------------------------------------------------------------------------------------------------------------------------------------------------------------------------------------------------------------------------|-------------------|------------------------------------------------------------|-----------------|---------------------------------------------|----------------------------------------------------------------------------------------------------|-----------------------------------------|------------------------------------------------------------------------------------------------------------------------|
| Author                                                                                                                                                                                                                                                                                                                                                                                                                                                                                                                                                                                                                                                                                                                                                                                                                                                                                                                               | Exam Age          | Population/Study Group                                     | Study Design    | Mercury Exposure Assessment                 | Outcomes (analyses)                                                                                | Findings                                | Comments                                                                                                               |
| Johansson et al., 2002                                                                                                                                                                                                                                                                                                                                                                                                                                                                                                                                                                                                                                                                                                                                                                                                                                                                                                               | ≥ 81 yrs, mean 87 | Subset (n=106) from Kungsholmen Project prospective cohort | Cross-sectional | Mean (range): Adult blood 3.4 (0.4-16) µg/L | Neurologic exam, Mini-Mental State Examination (MMSE), blood pressure, BMI; (correlation analysis) | Null study (Hg-MMSE correlation = 0.14) | No assessment for confounding. Subsample selected, in part, based on MMSE score. n=8 excluded for 'outlier' Hg values. |
| Supplemental Material, Table 2 Abbreviations: ADHD (Attention Deficit Hyperactivity Disorder); APOE (apolipoprotein E); BMI (body mass index); BPb (blood lead); btw (between); Cd (cadmium); CI (confidence interval); Cr (chromium); ctrl(s) (control(s)); DHA (docosahexaenoic acid); gen (general); geomean (geometric mean); Hg (mercury); IQ (intelligence quotient); IQR (interquartile range); MeHg (methylmercury); mm (millimeters) ;Mn (manganese); mos (months) ; ms (milliseconds); n-3 PUFA (omega 3 polyunsaturated fatty acid); neg (negative); Ni (nickel); non-sig (non-significant) ; OR (odds ratio); PCBs (polychlorinated biphenyls); pt(s) (point(s)); RBC (red blood cell); re (regarding); rel'p (relationship); resp (respiratory); RR (relative risk) ; rx (medication); rxn (reaction); SD (standard deviation); Se (selenium); SES (socioeconomic status); sig (significant); Sn (tin); sxs (symptoms). |                   |                                                            |                 |                                             |                                                                                                    |                                         |                                                                                                                        |

| Supplemental Material, Table S3. Published Studies of Low-Level Methylmercury Exposure and Cardiovascular Outcomes (listed by year of publication) |                                                                                                                         |                    |                             |                     |                                                                                                      |                                                                     |                                                                                                                 |                                                                                                                                           |
|----------------------------------------------------------------------------------------------------------------------------------------------------|-------------------------------------------------------------------------------------------------------------------------|--------------------|-----------------------------|---------------------|------------------------------------------------------------------------------------------------------|---------------------------------------------------------------------|-----------------------------------------------------------------------------------------------------------------|-------------------------------------------------------------------------------------------------------------------------------------------|
| Author                                                                                                                                             | Population/Study Group                                                                                                  | Study Design       | Sample Size                 | Exposure Assessment | Exposure Level                                                                                       | Outcomes                                                            | Findings                                                                                                        | Other contaminants/nutrients examined                                                                                                     |
| Salonen et al., 1995                                                                                                                               | Eastern Finnish men (42-60 years)                                                                                       | Prospective cohort | N=1833                      | Hair and urine Hg   | Hair Hg: Mean 1.92 µg/g (Range: 0-15.7 µg/g)<br>Urinary Hg: 1.18 µg/24 hr (Range: 0-4.95 µg/24 hr)   | AMI, death from CHD, CVD                                            | Over 2-fold risk of AMI and mortality from CHD and CVD associated with elevated hair Hg (>2 µg/g)               | Intake of fish, iron, plasma fibrinogen, serum selenium and apolipoprotein B, concentrations of HDL <sub>2</sub> cholesterol and ferritin |
| Salonen et al., 2000                                                                                                                               | Eastern Finnish men (42-60 years)                                                                                       | Prospective cohort | N=1014                      | Hair Hg             | Mean: 1.8 µg/g (Range: 0-23.3 µg/g)                                                                  | Carotid atherosclerosis (determined by intima-media thickness, IMT) | Hg associated with accelerated progression of carotid atherosclerosis.                                          | Intake of cholesterol, selenium and unspecified fatty acids, fibers, and vitamins                                                         |
| Rissanen et al., 2000                                                                                                                              | Eastern Finnish men (42-60 years)                                                                                       | Prospective cohort | N=1871                      | Hair Hg             | Mean: 1.91 µg/g (Range: 0-15.67 µg/g)                                                                | Fatal or nonfatal acute coronary events                             | Fish oil-derived fatty acids reduce risk of acute coronary events; high Hg in fish could attenuate this effect. | DPA+DHA, EPA, serum ferritin, serum LDL cholesterol, serum insulin                                                                        |
| Guallar et al., 2002                                                                                                                               | Men from eight European countries and Israel (70 years or younger)<br>Avg. age: Cases: 54.7±8.9yrs; Cntrls:53.2±9.3 yrs | Case-control study | Cases N=684; Controls N=724 | Toenail Hg          | Overall means: Cases = 0.27 µg/g (Range 0.14-0.68 µg/g); Controls = 0.25 µg/g (Range 0.14-0.57 µg/g) | First diagnosis of MI                                               | Toenail Hg associated with risk of MI; DHA inversely associated with risk.                                      | DHA, serum cholesterol                                                                                                                    |

| Supplemental Material, Table S3 (Cont.) Published Studies of Low-Level Methylmercury Exposure and Cardiovascular Outcomes (listed by year of publication) |                                            |                                                  |                                                                                   |                     |                                                                                                                |                                                                  |                                                                                                                                                                                                     |                                                                                                                         |
|-----------------------------------------------------------------------------------------------------------------------------------------------------------|--------------------------------------------|--------------------------------------------------|-----------------------------------------------------------------------------------|---------------------|----------------------------------------------------------------------------------------------------------------|------------------------------------------------------------------|-----------------------------------------------------------------------------------------------------------------------------------------------------------------------------------------------------|-------------------------------------------------------------------------------------------------------------------------|
| Author                                                                                                                                                    | Population/Study Group                     | Study Design                                     | Sample Size                                                                       | Exposure Assessment | Exposure Level                                                                                                 | Outcomes                                                         | Findings                                                                                                                                                                                            | Other contaminants/nutrients examined                                                                                   |
| Yoshizawa et al., 2002                                                                                                                                    | US male health professionals (40-75 years) | Nested case-control with five years of follow-up | 470 cases (from 33,737 members); 464 controls (matched by age and smoking status) | Toenail Hg          | Mean Hg, Cases = 0.74 µg/g;<br>Controls = 0.72 µg/g                                                            | CHD (coronary-artery surgery, nonfatal MI, fatal CHD)            | No association between Hg and risk of CHD; after excluding dentists, RR for highest exposure (0.84 µg/g) versus lowest (0.13 µg/g) = 1.27, not statistically significant.                           | Levels of DHA, EPA, selenium, and cadmium                                                                               |
| Virtanen et al. 2005                                                                                                                                      | Eastern Finnish men (42-60 years)          | Prospective cohort                               | N=1871                                                                            | Hair Hg             | Mean=1.9 µg/g (Range: 0-15.7 µg/g)                                                                             | Acute coronary events and cardiovascular and all-cause mortality | Increased Hg exposure associated with increased risk of acute coronary events and CVD mortality; Hg seemed to attenuate the protective effects of fish on cardiovascular health.                    | DHA+DPA, HDL and LDL cholesterol, serum selenium, dietary intakes of saturated fatty acids, fiber, and vitamins C and E |
| Vupputuri et al., 2005                                                                                                                                    | NHANES 1999-2000 Women (16-49 years)       | Cross-sectional survey of the US population      | N=1240                                                                            | Blood Hg            | Mean=1.8 µg/L (Range: 0.1-21.4 µg/L)<br>Fish consumers, Mean = 2.3 µg/L;<br>Non-fish consumers, Mean=0.8 µg/L) | Systolic and diastolic blood pressure                            | Hg not significantly associated with SBP or DBP in entire cohort; however, significant positive association between SBP and Hg among non-fish consumers (similar pattern for DBP, non-significant). | Intake of sodium, potassium, and fish                                                                                   |

| Supplemental Material, Table S3 (Cont.) Published Studies of Low-Level Methylmercury Exposure and Cardiovascular Outcomes (listed by year of publication) |                                                                                                     |                                                                |                                   |                     |                                                                                                                                               |                                                            |                                                                   |                                                                             |
|-----------------------------------------------------------------------------------------------------------------------------------------------------------|-----------------------------------------------------------------------------------------------------|----------------------------------------------------------------|-----------------------------------|---------------------|-----------------------------------------------------------------------------------------------------------------------------------------------|------------------------------------------------------------|-------------------------------------------------------------------|-----------------------------------------------------------------------------|
| Author                                                                                                                                                    | Population/Study Group                                                                              | Study Design                                                   | Sample Size                       | Exposure Assessment | Exposure Level                                                                                                                                | Outcomes                                                   | Findings                                                          | Other contaminants/nutrients examined                                       |
| Valera et al., 2009                                                                                                                                       | Nunavik Inuit (18-71 years)                                                                         | Prospective cohort                                             | N=732                             | Blood Hg            | Mean: 10.2 µg/L                                                                                                                               | BP, and pulse pressure                                     | Hg associated with increasing BP and pulse pressure.              | DHA, EPA, selenium, and lead levels, LDL and HDL cholesterol, triglycerides |
| Mozaffarian et al., 2011                                                                                                                                  | HPFS (male US health professionals), 40-75 years and NHS (female US registered nurses), 30-55 years | Nested case control study from both prospective cohort studies | Cases: N=3427<br>Controls: N=3427 | Toenail Hg          | Mean (SD):<br>Men:<br>Cases= 0.51 µg/g (2.13);<br>Controls=0.44 µg/g (0.47)<br>Women:<br>Cases=0.29 µg/g (0.49);<br>Controls=0.33 µg/g (0.63) | Incident CVD (i.e. nonfatal MI, fatal CHD or stroke)       | No adverse effects of Hg exposure on CHD, stroke, or total CVD.   | Selenium, consumption of fish, DHA, EPA                                     |
| Wennberg et al., 2011                                                                                                                                     | Northern Sweden cohort                                                                              | Nested case control study                                      | Cases: N=431<br>Controls: N=499   | Ery-Hg              | Median (range) of Ery-Hg:<br>3.54 (0.01-87) µg/g or<br>0.52 (0.0015-12.7) µg/g<br>hair-Hg                                                     | Myocardial infarction cases including sudden cardiac death | No adverse effect of mercury on the risk of myocardial infarction | Selenium, EPA, DHA                                                          |

Supplemental Material, Table 3 Abbreviations: AMI (acute myocardial infarction); CHD (coronary heart disease); CVD (cardiovascular disease); DBP (diastolic blood pressure); DHA (docosahexaenoic acid); DPA (docosapentaenoic acid); EPA (eicosapentaenoic acid); Ery-Hg (erythrocyte mercury); Hg (mercury); HPFS (Health Professionals Follow-up Study); IMT (intima media thickness); MI (myocardial infarction); NHANES (National Health and Nutrition Examination Survey); NHS (Nurse's Health Study); RR (relative risk); SBP (systolic blood pressure)



**Supplemental Material, Table S4.** Published Studies of Low-Level Methylmercury Exposure and Immunologic Outcomes (listed by year of publication)

| Author                    | Population/ Study Group                                                                        | Study Design                     | Sample Size                                                                     | Exposure Assessment                          | Exposure Level                                                                                                       | Findings                                                                                                                                                                                                                    | Effect Modifiers/Adjustment for Confounders                                                                                                                                                   |
|---------------------------|------------------------------------------------------------------------------------------------|----------------------------------|---------------------------------------------------------------------------------|----------------------------------------------|----------------------------------------------------------------------------------------------------------------------|-----------------------------------------------------------------------------------------------------------------------------------------------------------------------------------------------------------------------------|-----------------------------------------------------------------------------------------------------------------------------------------------------------------------------------------------|
| Belles-Isles et al., 2002 | Newborns in Canadian subsistence fishing population & coastal town residents (reference group) | Cross sectional (births 1995-97) | Mother-infant pairs: n=48 (subsistence fishers) & n=60 (coastal town residents) | Cord blood                                   | Cord blood Geomean (95% CI): 1.8 (1.4-2.3) µg/L (subsistence fishers); 0.9 (0.8-1.0) µg/L (coastal town residents)   | Cord blood Hg inversely correlated with proportion of naive helper T cells and plasma IgM levels in cord blood. No relationship with multiple other measures of T, B, and NK (natural killer) cell proportions and function | No adjustment for confounders despite substantial differences between subsistence fishers and coastal residents, including organochlorine exposures                                           |
| Bilrha et al., 2003       | Newborns in Canadian subsistence fishing population & coastal town residents (reference group) | Cross sectional (births 1997-98) | Mother-infant pairs: n=47 (subsistence fishers) n=65 (coastal town residents)   | Cord blood                                   | Cord blood Hg Geomean (95% CI): 1.8 (1.5-2.2) µg/L (subsistence fishers) 1.1 (0.9-1.2) µg/L (coastal town residents) | No correlation between cord blood Hg & cord blood lymphocyte activation markers or cytokine secretion.                                                                                                                      | No adjustment for confounders despite substantial differences between subsistence fishers and coastal residents, including organochlorine exposures                                           |
| Miyake et al., 2011       | Osaka Maternal and Child Health Study                                                          | Prospective prebirth cohort      | 582 mother/child pairs                                                          | Maternal hair and child hair at 29-39 months | Maternal hair Hg Median 1.52 µg/g Range 0.26 – 6.05 µg/g<br>Child hair Hg Median 1.38 µg/g Range 0.13 – 9.51 µg/g    | No association between hair mercury and risk of wheeze or eczema in children. Suggestive but non-significant eczema risk with OR = 1.26, 95% CI 0.67-2.36 for highest vs. lowest quartile of child hair Hg                  | Models adjusted for potential confounders including maternal pregnancy and child fish intake. Despite adjustment, authors consider there to be potential residual confounding by fish intake. |

**Supplemental Material, Table S4 (Cont.)** Published Studies of Low-Level Methylmercury Exposure and Immunologic Outcomes (listed by year of publication)

| Author              | Population/ Study Group                                   | Study Design                            | Sample Size                                                                 | Exposure Assessment                       | Exposure Level                                                                                                                                                   | Findings                                                                                                                                                                                                    | Effect Modifiers/Adjustment for Confounders                                                                                            |
|---------------------|-----------------------------------------------------------|-----------------------------------------|-----------------------------------------------------------------------------|-------------------------------------------|------------------------------------------------------------------------------------------------------------------------------------------------------------------|-------------------------------------------------------------------------------------------------------------------------------------------------------------------------------------------------------------|----------------------------------------------------------------------------------------------------------------------------------------|
| Nyland et al., 2011 | Mother-infant pairs in Brazilian Amazon                   | Population-based Survey                 | 61 mother-infant pairs                                                      | Cord blood and maternal blood at delivery | Cord blood Hg:<br>9.63 µg/L<br>Range: 0.08-77.80 µg/L<br><br>Maternal blood Hg:<br>6.90 µg/L<br>Range: 0.08-55.48 µg/L                                           | Total IgG level in cord blood significantly positively associated with cord blood and maternal Hg levels.<br>No associations seen with serum ANA titers or cytokine levels.                                 | Adjusted for maternal age, education level, and residence (no fish consumption information but education correlated with fish intake). |
| Park & Kim, 2011    | General adult population (≥20 years) in Republic of Korea | Population based cross sectional survey | 1990 Korean adults [11% with lifetime s AD; 9% with AD within 1yr of study] | Adult blood                               | Geomean, no AD:<br>3.45 µg/L<br>(95% CI 3.17-3.76)<br>Geomean, lifetime AD:<br>4.66 µg/L (95% CI 3.81-5.70)<br>Geomean, 1 yr AD:<br>4.91 µg/L (95% CI 3.97-6.08) | Hg significantly associated with increased lifetime and 1 yr AD:<br>OR (95% CI) lifetime AD, upper vs. lower tertile Hg:<br>1.50 (1.02-2.21)<br>OR 1 yr AD, upper vs. lower tertile Hg:<br>1.82 (1.17-2.83) | Adjusted for multiple potential confounders including fish & shellfish intake.                                                         |

Supplemental Material, Table 4 Abbreviations: AD (atopic dermatitis); ANA (antinuclear autoantibody); BMI (body mass index); BPb (blood lead); CI (confidence interval); DDE (dichlorodiphenyldichloroethylene); geomean (geometric mean); Hg (mercury); ;med (medium); mos (months); OR (odds ratio); n-3 PUFAs (omega-3 polyunsaturated fatty acids); PCBs (polychlorinated biphenyls); SES (socioeconomic status)

## REFERENCES

- Barbone F, Valent F, Pisa F, Daris F, Fajon V, Ing D, et al. 2004. Prenatal low-level methylmercury exposure and child development in an Italian coastal area. *Seychelles Medical and Dental Journal (SMDJ)* 7(1): 149-154.
- Belles-Isles M, Ayotte P, Dewailly E, Weber J-P, Roy R. 2002. Cord blood lymphocyte functions in newborns from a remote maritime population exposed to organochlorines and methylmercury. *J Toxicol Environ Health A* 65:165-182.
- Bilrha H, Roy R, Moreau B, Belles-Isles M, Dewailly E, Ayotte P. 2003. In vitro activation of cord blood mononuclear cells and cytokine production in a remote coastal population exposed to organochlorines and methyl mercury. *Environ Health Perspect* 111(16): 1952-1957.
- Boucher O, Bastien CH, Saint-Amour D, Dewailly E, Ayotte P, Jacobson JL, et al. 2010. Prenatal exposure to methylmercury and PCBs affects distinct stages of information processing: an event-related potential study with Inuit children. *Neurotoxicology* 31(4): 373-384.
- Cace IB, Milardovic A, Prpic I, Krajina R, Petrovic O, Vukelic P, et al. 2011. Relationship between the prenatal exposure to low-level of mercury and the size of a newborn's cerebellum. *Med Hypotheses* 76(4): 514-516.
- Cao Y, Chen A, Jones RL, Radcliffe J, Caldwell KL, Dietrich KN, et al. 2010. Does background postnatal methyl mercury exposure in toddlers affect cognition and behavior? *Neurotoxicology* 31(1): 1-9.
- Cheuk DK, Wong V. 2006. Attention-deficit hyperactivity disorder and blood mercury level: a case-control study in Chinese children. *Neuropediatrics* 37(4): 234-240.
- Daniels JL, Longnecker MP, Rowland AS, Golding J. 2004. Fish intake during pregnancy and early cognitive development of offspring. *Epidemiology* 15(4): 394-402.
- Daniels JL, Rowland AS, Longnecker MP, Crawford P, Golding J. 2007. Maternal dental history, child's birth outcome and early cognitive development. *Paediatr Perinat Epidemiol* 21(5): 448-457.
- Despres C, Beuter A, Richer F, Poitras K, Veilleux A, Ayotte P, et al. 2005. Neuromotor functions in Inuit preschool children exposed to Pb, PCBs, and Hg. *Neurotoxicol Teratol* 27(2): 245-257.

- Drouillet-Pinard P, Huel G, Slama R, Forhan A, Sahuquillo J, Goua V, et al. 2010. Prenatal mercury contamination: relationship with maternal seafood consumption during pregnancy and fetal growth in the 'EDEN mother-child' cohort. *Br J Nutr* 104(8): 1096-1100.
- Freire C, Ramos R, Lopez-Espinosa MJ, Diez S, Vioque J, Ballester F, et al. 2010. Hair mercury levels, fish consumption, and cognitive development in preschool children from Granada, Spain. *Environ Res* 110(1): 96-104.
- Gao Y, Yan CH, Tian Y, Wang Y, Xie HF, Zhou X, et al. 2007. Prenatal exposure to mercury and neurobehavioral development of neonates in Zhoushan City, China. *Environ Res* 105(3): 390-399.
- Guallar E, Sanz-Gallardo MI, van't Veer P, Bode P, Aro A, Gomez-Aracena J, et al. 2002. Mercury, fish oils, and the risk of myocardial infarction. *N Engl J Med* 347(22): 1747-1754.
- Gundacker C, Frohlich S, Graf-Rohrmeister K, Eibenberger B, Jessenig V, Gicic D, et al. 2010. Perinatal lead and mercury exposure in Austria. *Sci Total Environ* 408(23): 5744-5749.
- Ha M, Kwon HJ, Lim MH, Jee YK, Hong YC, Leem JH, et al. 2009. Low blood levels of lead and mercury and symptoms of attention deficit hyperactivity in children: a report of the children's health and environment research (CHEER). *Neurotoxicology* 30(1): 31-36.
- Jedrychowski W, Jankowski J, Flak E, Skarupa A, Mroz E, Sochacka-Tatara E, et al. 2006. Effects of prenatal exposure to mercury on cognitive and psychomotor function in one-year-old infants: epidemiologic cohort study in Poland. *Ann Epidemiol* 16(6): 439-447.
- Jedrychowski W, Perera F, Rauh V, Flak E, Mroz E, Pac A, et al. 2007. Fish intake during pregnancy and mercury level in cord and maternal blood at delivery: an environmental study in Poland. *Int J Occup Med Environ Health* 20(1): 31-37.
- Johansson N, Basun H, Winblad B, Nordberg M. 2002. Relationship between mercury concentration in blood, cognitive performance, and blood pressure, in an elderly urban population. *Biometals* 15(2): 189-195.
- Kim BM, Lee BE, Hong YC, Park H, Ha M, Kim YJ, Kim Y, Chang N, Kim BN, Oh SY, Yoo M, Ha EH. 2011. Mercury levels in maternal and cord blood and attained weight through the 24 months of life. *Sci Total Environ* 410: 26-33.
- Lederman SA, Jones RL, Caldwell KL, Rauh V, Sheets SE, Tang D, et al. 2008. Relation between cord blood mercury levels and early child development in a World Trade Center cohort. *Environ Health Perspect* 116(8): 1085-1091.

- Lee BE, Hong YC, Park H, Ha M, Koo BS, Chang N, et al. 2010. Interaction between GSTM1/GSTT1 polymorphism and blood mercury on birth weight. *Environ Health Perspect* 118(3): 437-443.
- Lucas M, Dewailly E, Muckle G, Ayotte P, Bruneau S, Gingras S, et al. 2004. Gestational age and birth weight in relation to n-3 fatty acids among Inuit (Canada). *Lipids* 39(7): 617-626.
- Miyake Y, Tanaka K, Yasutake A, Sasaki S, Hirota Y. 2011. Lack of association of mercury with risk of wheeze and eczema in Japanese children: The Osaka Maternal and Child Health Study. *Environ Res* 111(2011): 1180-1184.
- Mozaffarian D, Shi P, Morris JS, Spiegelman D, Grandjean P, Siscovick DS, et al. 2011. Mercury exposure and risk of cardiovascular disease in two U.S. cohorts. *N Engl J Med* 364(12): 1116-1125.
- Nyland JF, Wang SB, Shirley DL, Santos EO, Ventura AM, Souza JM, et al. 2011. Fetal and maternal immune responses to methylmercury exposure: a cross-sectional study. *Environ Res*. 111(2011): 584-589.
- Oken E, Radesky JS, Wright RO, Bellinger DC, Amarasiriwardena CJ, Kleinman KP, et al. 2008. Maternal fish intake during pregnancy, blood mercury levels, and child cognition at age 3 years in a US cohort. *Am J Epidemiol* 167(10): 1171-1181.
- Oken E, Wright RO, Kleinman KP, Bellinger D, Amarasiriwardena CJ, Hu H, et al. 2005. Maternal fish consumption, hair mercury, and infant cognition in a U.S. Cohort. *Environ Health Perspect* 113(10): 1376-1380.
- Park H and Kim K. 2011. Association of blood mercury concentrations with atopic dermatitis in adults: a population-based study in Korea. *Environ Res* 111(2011): 573-578.
- Philibert A, Bouchard M, Mergler D. 2008. Neuropsychiatric symptoms, omega-3, and mercury exposure in freshwater fish-eaters. *Arch Environ Occup Health* 63(3): 143-153.
- Plusquellec P, Muckle G, Dewailly E, Ayotte P, Begin G, Desrosiers C, et al. 2010. The relation of environmental contaminants exposure to behavioral indicators in Inuit preschoolers in Arctic Quebec. *Neurotoxicology* 31(1): 17-25.
- Ramon R, Ballester F, Aguinagalde X, Amurrio A, Vioque J, Lacasana M, et al. 2009. Fish consumption during pregnancy, prenatal mercury exposure, and anthropometric measures at birth in a prospective mother-infant cohort study in Spain. *Am J Clin Nutr* 90(4): 1047-1055.

- Rissanen T, Voutilainen S, Nyysönen K, Lakka TA, Salonen JT. 2000. Fish oil-derived fatty acids, docosahexaenoic acid and docosapentaenoic acid, and the risk of acute coronary events: the Kuopio ischaemic heart disease risk factor study. *Circulation* 102(22): 2677-2679.
- Saint-Amour D, Roy MS, Bastien C, Ayotte P, Dewailly E, Despres C, et al. 2006. Alterations of visual evoked potentials in preschool Inuit children exposed to methylmercury and polychlorinated biphenyls from a marine diet. *Neurotoxicology* 27(4): 567-578.
- Salonen JT, Seppanen K, Lakka TA, Salonen R, Kaplan GA. 2000. Mercury accumulation and accelerated progression of carotid atherosclerosis: a population-based prospective 4-year follow-up study in men in eastern Finland. *Atherosclerosis* 148(2): 265-273.
- Salonen JT, Seppanen K, Nyysönen K, Korpela H, Kauhanen J, Kantola M, et al. 1995. Intake of mercury from fish, lipid peroxidation, and the risk of myocardial infarction and coronary, cardiovascular, and any death in eastern Finnish men. *Circulation* 91(3): 645-655.
- Sikorski R, Paszkowski T, Szprengier-Juszkiewicz T. 1986. Mercury in neonatal scalp hair. *Sci Total Environ* 57: 105-110.
- Stewart PW, Reihman J, Lonky EI, Darvill TJ, Pagano J. 2003. Cognitive development in preschool children prenatally exposed to PCBs and MeHg. *Neurotoxicol Teratol* 25(1): 11-22.
- Surkan PJ, Wypij D, Trachtenberg F, Daniel DB, Barregard L, McKinlay S, et al. 2009. Neuropsychological function in school-age children with low mercury exposures. *Environ Res* 109(6): 728-733.
- Suzuki K, Nakai K, Sugawara T, Nakamura T, Ohba T, Shimada M, et al. 2010. Neurobehavioral effects of prenatal exposure to methylmercury and PCBs, and seafood intake: neonatal behavioral assessment scale results of Tohoku study of child development. *Environ Res* 110(7): 699-704.
- Torrente M, Colomina MT, Domingo JL. 2005. Metal concentrations in hair and cognitive assessment in an adolescent population. *Biol Trace Elem Res* 104(3): 215-221.
- Valera B, Dewailly E, Poirier P. 2009. Environmental mercury exposure and blood pressure among Nunavik Inuit adults. *Hypertension* 54(5): 981-986.

- Virtanen JK, Voutilainen S, Rissanen TH, Mursu J, Tuomainen TP, Korhonen MJ, et al. 2005. Mercury, fish oils, and risk of acute coronary events and cardiovascular disease, coronary heart disease, and all-cause mortality in men in eastern Finland. *Arterioscler Thromb Vasc Biol* 25(1): 228-233.
- Vupputuri S, Longnecker MP, Daniels JL, Guo X, Sandler DP. 2005. Blood mercury level and blood pressure among US women: results from the National Health and Nutrition Examination Survey 1999-2000. *Environ Res* 97(2): 195-200.
- Weil M, Bressler J, Parsons P, Bolla K, Glass T, Schwartz B. 2005. Blood mercury levels and neurobehavioral function. *Jama* 293(15): 1875-1882.
- Wennberg M, Bergdahl IA, Hallmans G, Norberg M, Lundh T, Skerfving S, Strömberg U, Vessby B, Jansson JH. 2011. Fish consumption and myocardial infarction: a second prospective biomarker study from northern Sweden. *Am J Clin Nutr*. 93(1):27-36.
- Xue F, Holzman C, Rahbar MH, Trosko K, Fischer L. 2007. Maternal fish consumption, mercury levels, and risk of preterm delivery. *Environ Health Perspect* 115(1): 42-47.
- Yokoo EM, Valente JG, Grattan L, Schmidt SL, Platt I, Silbergeld EK. 2003. Low level methylmercury exposure affects neuropsychological function in adults. *Environ Health* 2(1): 8.
- Yoshizawa K, Rimm EB, Morris JS, Spate VL, Hsieh CC, Spiegelman D, et al. 2002. Mercury and the risk of coronary heart disease in men. *N Engl J Med* 347(22): 1755-1760.
